# Supplementary material for: High carbohydrate intake from starchy foods is positively associated with metabolic disorders: a Cohort Study from a Chinese population
Source: PubMed Central journal article supplement (PMC4652281; doi:10.1038/srep16919), 2015-11-19
Supplement: srep16919-s1.pdf [file srep16919-s1.pdf]

**High carbohydrate intake from starchy foods is positively associated with  
metabolic disorders: a Cohort Study from a Chinese population**

Rennan Feng\*, Shanshan Du\*, Yang Chen\*, Sining Zheng, Wei Zhang, Guanqiong Na,  
Ying Li & Changhao Sun

Table S1. The risk ratios (RRs) of metabolic disorders for high or medium and low GI starchy food.

|                               | Cases/n | Model 1         | Model 2         | Model 3         | Model 4         |
|-------------------------------|---------|-----------------|-----------------|-----------------|-----------------|
| <b>High GI Food</b>           |         |                 |                 |                 |                 |
| Hyperlipidemia                |         |                 |                 |                 |                 |
| Q1                            | 100/562 | 1.00            | 1.00            | 1.00            | 1.00            |
| Q2                            | 110/564 | 1.12(0.79,1.61) | 1.01(0.70,1.46) | 0.96(0.65,1.42) | 1.01(0.67,1.50) |
| Q3                            | 104/564 | 1.01(0.71,1.45) | 0.94(0.65,1.36) | 0.91(0.61,1.35) | 0.99(0.65,1.51) |
| Q4                            | 124/562 | 1.37(1.09,2.24) | 1.30(1.02,1.88) | 1.37(1.08,2.24) | 1.32(1.03,2.17) |
| MetS                          |         |                 |                 |                 |                 |
| Q1                            | 77/682  | 1.00            | 1.00            | 1.00            | 1.00            |
| Q2                            | 89/684  | 1.23(0.86,1.75) | 1.14(0.79,1.65) | 1.05(0.72,1.55) | 1.06(0.71,1.57) |
| Q3                            | 91/682  | 1.24(0.87,1.76) | 1.19(0.82,1.71) | 1.14(0.77,1.67) | 1.16(0.78,1.75) |
| Q4                            | 105/686 | 1.51(1.07,2.14) | 1.46(1.02,2.09) | 1.47(1.02,2.11) | 1.57(1.01,2.42) |
| <b>Medium and low GI Food</b> |         |                 |                 |                 |                 |
| Hyperlipidemia                |         |                 |                 |                 |                 |
| Q1                            | 117/562 | 1.00            | 1.00            | 1.00            | 1.00            |
| Q2                            | 95/564  | 0.74(0.52,1.06) | 0.70(0.48,1.06) | 0.69(0.47,1.03) | 0.71(0.49,1.09) |
| Q3                            | 114/564 | 1.03(0.72,1.46) | 0.94(0.65,1.35) | 0.87(0.59,1.28) | 0.89(0.60,1.31) |
| Q4                            | 112/562 | 1.02(0.71,1.45) | 0.94(0.65,1.35) | 0.89(0.61,1.31) | 0.93(0.63,1.37) |
| MetS                          |         |                 |                 |                 |                 |
| Q1                            | 103/682 | 1.00            | 1.00            | 1.00            | 1.00            |
| Q2                            | 86/684  | 0.80(0.57,1.13) | 0.73(0.51,1.04) | 0.71(0.50,1.06) | 0.69(0.45,1.02) |
| Q3                            | 80/682  | 0.75(0.54,1.10) | 0.70(0.50,1.03) | 0.69(0.49,1.02) | 0.70(0.49,1.03) |
| Q4                            | 93/686  | 0.88(0.63,1.23) | 0.80(0.57,1.14) | 0.75(0.52,1.08) | 0.76(0.53,1.11) |

Model 1 has not been adjusted by any potential factors; Model 2 has been adjusted by age, sex, BMI; Model 3 has been adjusted by age, sex, BMI, smoke, drink, physical activities, total energy, fat and fiber; Model 4 has been adjusted by all factors in Model 3 and SBP, TC and TG.

Table S2 Food items in current study.

| Food Groups             | Food Items                                                                                                                                                                                                                  |
|-------------------------|-----------------------------------------------------------------------------------------------------------------------------------------------------------------------------------------------------------------------------|
| Starchy foods           |                                                                                                                                                                                                                             |
| Rice                    | Rice, millet, corn                                                                                                                                                                                                          |
| Wheaten foods           | Cookie, cake, steamed buns, noodle, bread                                                                                                                                                                                   |
| Potato and its products | White potato, sweet potato, vermicelli                                                                                                                                                                                      |
| Other foods             |                                                                                                                                                                                                                             |
| Beans                   | Beans, beancurd, soybean milk, uncongealed beancurd                                                                                                                                                                         |
| Vegetables              | Turnip, carrot, spinage, bean sprout, eggplant, tomato, green bean, pepper, winter melon, cucumber, pumkin, garlic, shallot, onion, onion chives, cabbage, sauerkraut, agaric, cauliflower, celery, lettuce, mushroom, kelp |
| Fruits                  | Apple, jujude, persimmon, pear, orange, peach, grape, pomegranate, strawberry, kiwi fruit, pineapple, litchi, mango, pawpaw, watermelon, honey melon, mushmelon                                                             |
| Livestock               | Pork, beef, mutton, sausage, liver and internal organs                                                                                                                                                                      |
| Poultry                 | Chicken, duck, goose                                                                                                                                                                                                        |
| Dairy                   | Milk, yoghurt, milk power                                                                                                                                                                                                   |
| Eggs                    | Eggs                                                                                                                                                                                                                        |
| Fish                    | Fish, shellfish, mollusc                                                                                                                                                                                                    |
| Snack                   | Preserved, biscuit, chocolate, peanut, melon seed, nuts                                                                                                                                                                     |
| Beverage                | Carbonated beverage, fruit juice, tea, coffee                                                                                                                                                                               |
| Ice cream               | Ice cream                                                                                                                                                                                                                   |
